# Supplementary material
Source: publisher site journal article supplement (https://www.dovepress.com/article/374930)
Supplement: Supplementary file 1 [file get_supplementary_file.php]

## Supplementary data

### Table S1 A. Classification table of ESSENCE-Q toward indication for work-up

| **Threshold** | **Specificity** | **Sensitivity** | **Accuracy** | **Negative predictive value** | **Positive predictive value** | **Youden index** | **Positive likelihood ratio** | **Negative likelihood ratio** |
| --- | --- | --- | --- | --- | --- | --- | --- | --- |
| -Inf | 0% | 100% | 62% |  | 62% | 0 | 1.0 |  |
| 0.5 | 63% | 66% | 65% | 54% | 74% | 0.29 | 1.8 | 0.5 |
| 1.5 | 73% | 59% | 64% | 53% | 78% | 0.32 | 2.2 | 0.6 |
| 2.5 | 80% | 52% | 63% | 51% | 81% | 0.32 | 2.6 | 0.6 |
| 3.5 | 86% | 44% | 60% | 49% | 83% | 0.3 | 3.1 | 0.7 |
| 4.5 | 89% | 37% | 57% | 47% | 84% | 0.26 | 3.3 | 0.7 |
| 5.5 | 93% | 35% | 57% | 47% | 89% | 0.28 | 5.0 | 0.7 |
| 6.5 | 99% | 32% | 57% | 47% | 97% | 0.3 | 22.3 | 0.7 |
| 7.5 | 99% | 29% | 56% | 46% | 97% | 0.28 | 20.4 | 0.7 |
| 8.5 | 99% | 28% | 55% | 46% | 97% | 0.27 | 19.8 | 0.7 |
| 9.5 | 100% | 24% | 53% | 45% | 100% | 0.24 | Inf | 0.8 |
| 10.5 | 100% | 23% | 52% | 45% | 100% | 0.23 | Inf | 0.8 |
| 11.5 | 100% | 19% | 50% | 43% | 100% | 0.19 | Inf | 0.8 |
| 12.5 | 100% | 16% | 48% | 42% | 100% | 0.16 | Inf | 0.8 |
| 13.5 | 100% | 12% | 46% | 41% | 100% | 0.12 | Inf | 0.9 |
| 14.5 | 100% | 10% | 44% | 41% | 100% | 0.1 | Inf | 0.9 |
| 15.5 | 100% | 7% | 43% | 40% | 100% | 0.07 | Inf | 0.9 |
| 16.5 | 100% | 5% | 42% | 40% | 100% | 0.05 | Inf | 1.0 |
| 17.5 | 100% | 4% | 41% | 39% | 100% | 0.04 | Inf | 1.0 |
| 18.5 | 100% | 4% | 40% | 39% | 100% | 0.04 | Inf | 1.0 |
| 20 | 100% | 2% | 39% | 39% | 100% | 0.02 | Inf | 1.0 |
| Inf | 100% | 0% | 38% | 38% |  | 0 |  | 1.0 |

Notes: Outcome defined as the need for clinical work-up related to neurodevelopmental problems to some extent. Threshold denotes cutoffs in the ESSENCE-Q (range 0-24). Accuracy is defined as proportion accurately classified (true positive + true negative / all positive and negative) ]) negative predictive value (NPV=true negative/all negative) positive predictive value (PPV= true positive/all positive), Youden index (sensitivity + specificity -1), positive likelihood ratio (LR+) and negative likelihood ratio (LR-) (LR+ = True positive/False positive, LR- = True negative / False negative).

### Table S1 B. Classification table of ESSENCE-Q toward clinical level impairment

| **Threshold** | **Specificity** | **Sensitivity** | **Accuracy** | **Negative predictive value** | **Positive predictive value** | **Youden index** | **Positive likelihood ratio** | **Negative likelihood ratio** |
| --- | --- | --- | --- | --- | --- | --- | --- | --- |
| -Inf | 0% | 100% | 39% |  | 39% | 0 | 1.0 |  |
| 0.5 | 64% | 85% | 72% | 87% | 60% | 0.49 | 2.4 | 0.2 |
| 1.5 | 73% | 78% | 75% | 84% | 65% | 0.51 | 2.9 | 0.3 |
| 2.5 | 81% | 72% | 78% | 82% | 71% | 0.53 | 3.8 | 0.3 |
| 3.5 | 86% | 61% | 76% | 77% | 73% | 0.47 | 4.2 | 0.5 |
| 4.5 | 88% | 51% | 74% | 74% | 74% | 0.4 | 4.4 | 0.6 |
| 5.5 | 92% | 50% | 75% | 74% | 80% | 0.42 | 6.2 | 0.5 |
| 6.5 | 95% | 44% | 75% | 73% | 86% | 0.4 | 9.9 | 0.6 |
| 7.5 | 96% | 42% | 75% | 72% | 88% | 0.38 | 11.6 | 0.6 |
| 8.5 | 96% | 40% | 74% | 71% | 88% | 0.37 | 11.2 | 0.6 |
| 9.5 | 98% | 35% | 73% | 70% | 93% | 0.33 | 19.3 | 0.7 |
| 10.5 | 99% | 35% | 74% | 70% | 96% | 0.34 | 38.5 | 0.7 |
| 11.5 | 99% | 28% | 71% | 68% | 95% | 0.27 | 30.8 | 0.7 |
| 12.5 | 99% | 24% | 69% | 67% | 94% | 0.23 | 26.2 | 0.8 |
| 13.5 | 100% | 19% | 68% | 66% | 100% | 0.19 | Inf | 0.8 |
| 14.5 | 100% | 15% | 67% | 65% | 100% | 0.15 | Inf | 0.9 |
| 15.5 | 100% | 11% | 65% | 63% | 100% | 0.11 | Inf | 0.9 |
| 16.5 | 100% | 8% | 64% | 63% | 100% | 0.08 | Inf | 0.9 |
| 17.5 | 100% | 7% | 63% | 62% | 100% | 0.07 | Inf | 0.9 |
| 18.5 | 100% | 6% | 63% | 62% | 100% | 0.06 | Inf | 0.9 |
| 20 | 100% | 3% | 62% | 61% | 100% | 0.03 | Inf | 1.0 |
| Inf | 100% | 0% | 61% | 61% |  | 0 |  | 1.0 |

Notes: Outcome defined as clinically relevant neurodevelopmental problems (Clinical global impression severity 4-7). Threshold denotes cutoffs in the ESSENCE-Q (range 0-24). Accuracy is defined as proportion accurately classified (true positive + true negative / all positive and negative), ]) negative predictive value (NPV=true negative/all negative) positive predictive value (PPV= true positive/all positive), Youden index (sensitivity + specificity -1), positive likelihood ratio (LR+) and negative likelihood ratio (LR-) (LR+ = True positive/False positive, LR- = True negative / False negative).
